# Supplementary material for: Fast synthesis of hierarchical Al-free Ti-BEA plate-like nanocrystals from low-templated dry gel via a steam-assisted conversion method
Source: Royal Society of Chemistry journal article supplement (doi:10.1039/c9gc03869h), 2020-01-01
Supplement: c9gc03869h1.pdf [file c9gc03869h1.pdf]

## Supplementary information

of

### **Fast synthesis of hierarchical Al-free Ti-BEA nanocrystals from low-templated dry gel via a steam-assisted conversion method**

Yuying Luo<sup>a,b</sup>, Yadong Zhu<sup>a,b</sup>, Jianguo Pan<sup>c</sup>, Xiaohui Chen<sup>b\*</sup>

<sup>a</sup> National Engineering Research Center of Chemical Fertilizer Catalyst, School of Chemical Engineering, Fuzhou University, Fuzhou 350002, Fujian, P. R. China.

<sup>b</sup> School of Chemical Engineering, Fuzhou University, Fuzhou, 350116, Fujian, P. R. China.  
Jingmen Branch of China Petroleum & Chemical Corporation (SINOPEC).

\*Correspondence author. Tel: (+86)591-83731234-8607, Fax: (+86)591-83738808,

E-mail: [chenxfz@fzu.edu.cn](mailto:chenxfz@fzu.edu.cn).

### **Chemicals involved in the Ti-BEA synthesis**

In the synthesis of Al-free Ti-BEA zeolites, the reagents used include fumed silica (Aerosil®200, Shanbo Co. Ltd., China), ammonium hexafluorotitanate ( $\text{H}_8\text{F}_6\text{N}_2\text{Ti}$ , AR, Maclin, Co. Ltd., China), sodium hydroxide (NaOH, AR, Xilong, Co. Ltd., China), aqueous tetraethylammonium hydroxide (TEAOH, 25 wt%, Xiya Reagent, China). All the reagents were invoked as purchased without any further purification.

### **Synthesis of pure Si-BEA seeds and its physicochemical property**

Briefly, 0.64 g NaOH and 4.71 g TEAOH solution were dissolved in 60 g distilled water, and stirred until the formation of a clear solution. Then, 6.0 g silicon source was added to the clear solution and the resulting mixture was stirred vigorously for 20 min at room temperature to form a uniform gel with the molar composition of  $\text{SiO}_2:0.16\text{NaOH}:0.08\text{TEAOH}:33\text{H}_2\text{O}$ . Then the gel was heated at 70 °C for 24 h to form a dry gel and grinded into a fine powder. 5.0 g of obtained dry gel was weighed and transferred into a 10 mL small Teflon cup. The loaded Teflon cup was placed in a 40 mL Teflon-lined stainless-steel autoclave, and 1.25 g distilled water was added into the bottom of Teflon liner without contacting the dry gel. The autoclave was sealed and heated at 418 K for 24 h, then the as-prepared pure-Si BEA was obtained after washing and drying.

The detailed synthetic procedure and physicochemical property of the pure Si-BEA seeds were reported on our previous study (Y.L. Luo, Q.M. Huang, X.H. Chen, Micropor. Mesopor. Mater. DOI: 10.1016/j.micromeso.2019.109675).

## Figures and Schemes

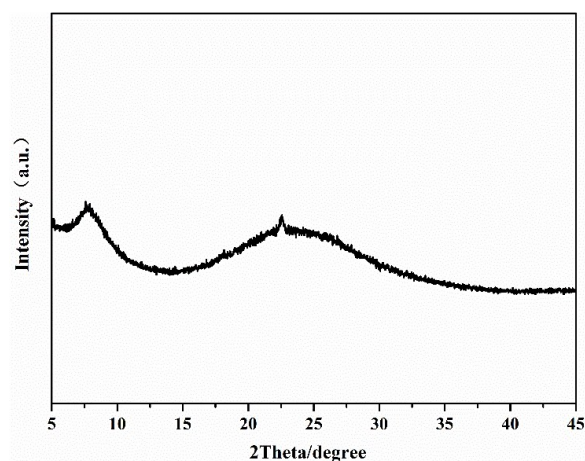

**Fig.S1.** XRD pattern of sample obtained without addition of  $\text{Na}^+$  after 2 days at 145 °C. Only very weak reflections can be observed. They could originate from the seeds added in the gel.

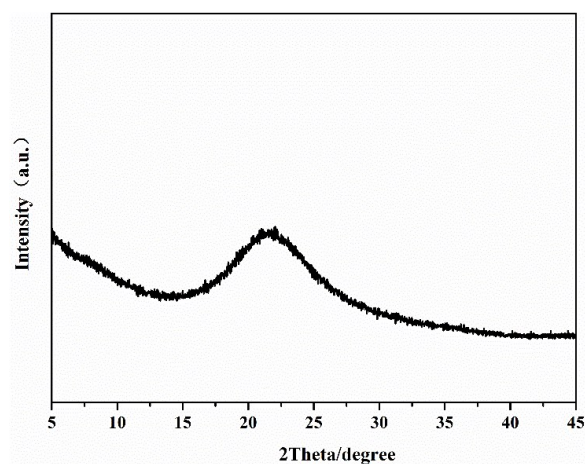

**Fig.S2.** XRD pattern of sample directly synthesized with  $\text{NH}_4\text{NO}_3$  after 2 days at 145 °C. Only amorphous substances exist, indicating that ammonium ions added to the precursor cannot replace sodium ions.

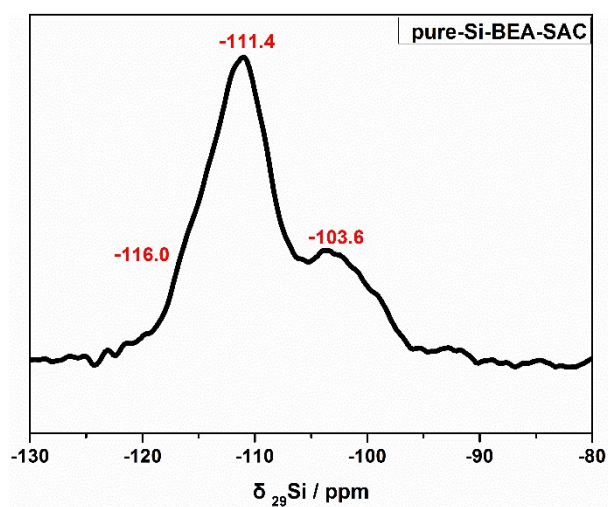

**Fig.S3.**  $^{29}\text{Si}$  MAS NMR spectra of pure-Si-BEA-SAC sample.

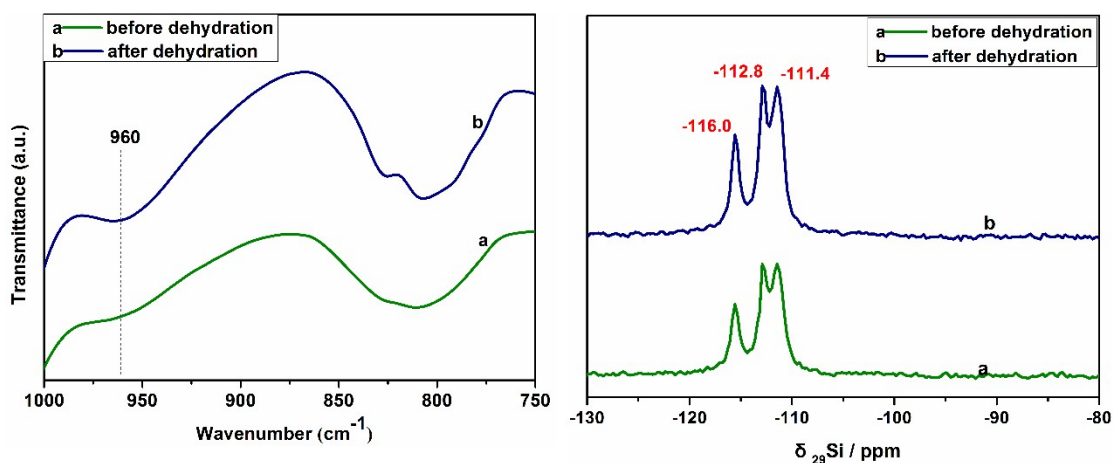

**Fig.S4.** DRIFT (left) and <sup>29</sup>Si MAS NMR (right) spectra of Ti-BEA-70 samples before dehydration (a) and after dehydration (b).

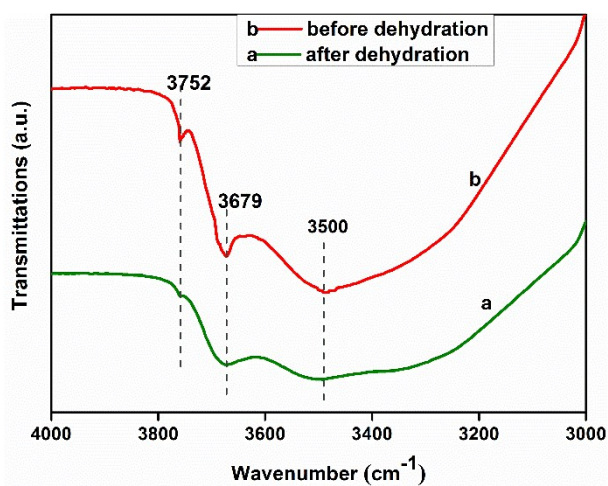

**Fig.S5.** DRIFT spectra of Ti-BEA-70 samples before and after dehydration: the stretching vibration of various silanol hydroxyl groups between 3000~4000 nm.

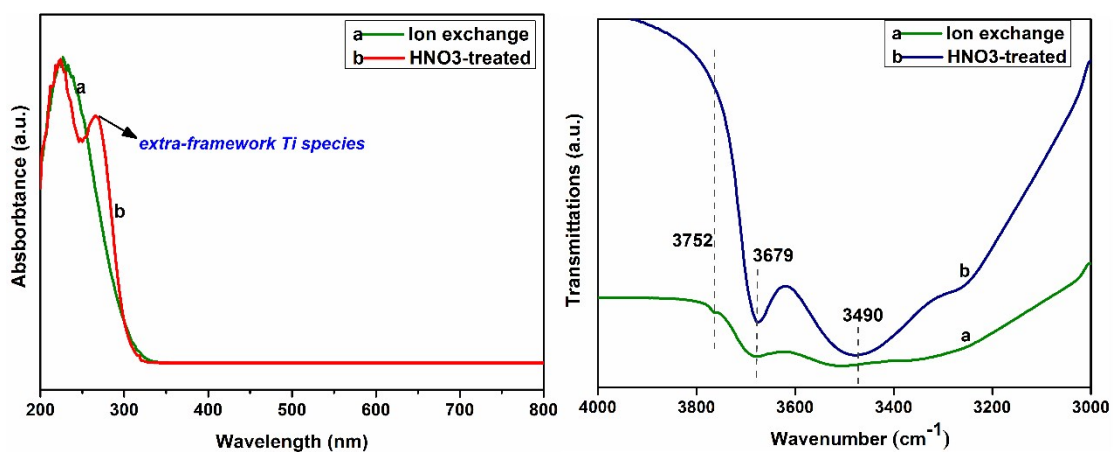

**Fig.S6.** UV-Vis (left) and DRIFT (right) spectra for Ti-BEA samples with different pretreatments: (a) ion exchange and (b) HNO<sub>3</sub> washing.

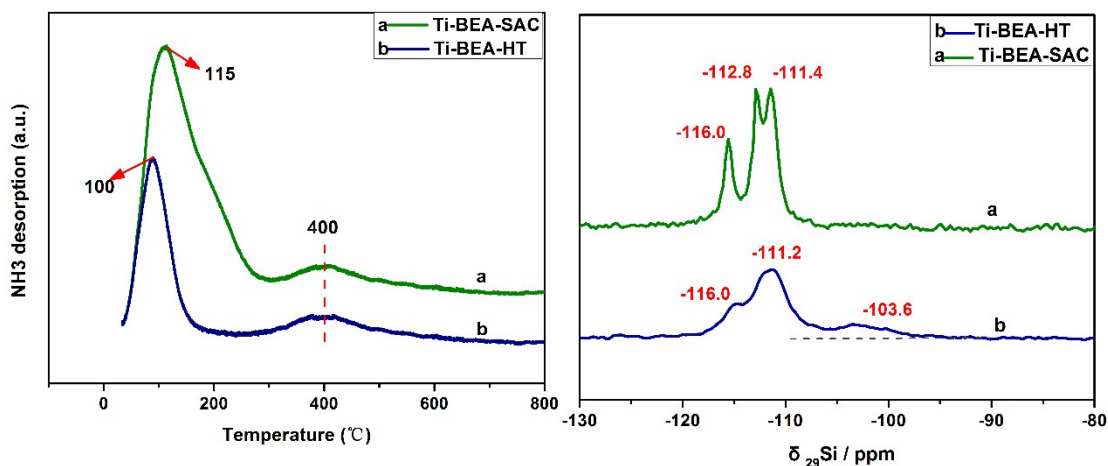

**Fig.S7.** NH<sub>3</sub>-TPD curves (left) and <sup>29</sup>Si MAS NMR (right) spectra of Ti-BEA-SAC (a) and Ti-BEA-HT (b) with the same Si/Ti=70 in precursor.

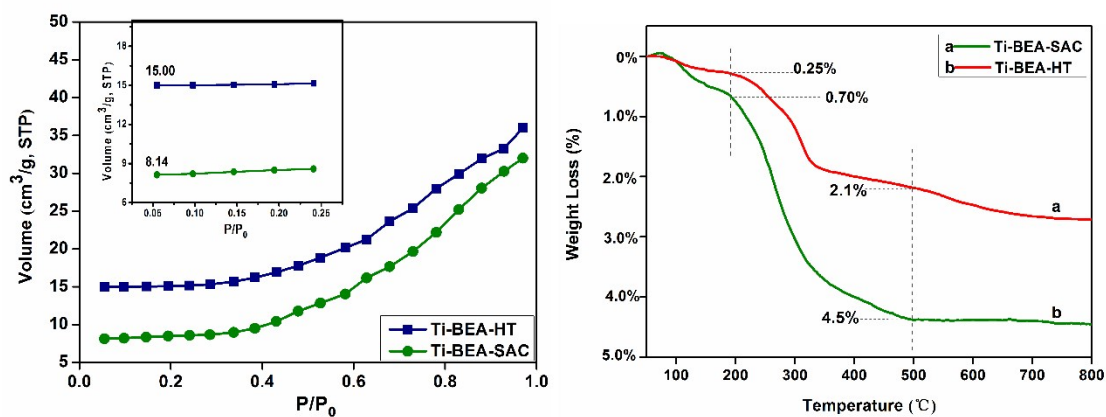

**Fig.S8.** Water adsorption isotherms (left) and TG curves (right) of Ti-BEA-SAC and Ti-BEA-HT samples.

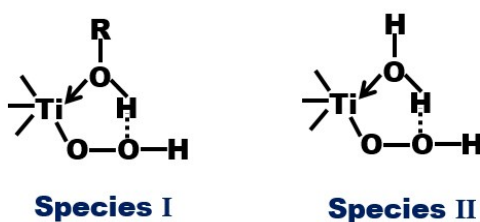

**Scheme S1.** Two different intermediates Species I and Species II in protic and aprotic solvents in Ti active sites.

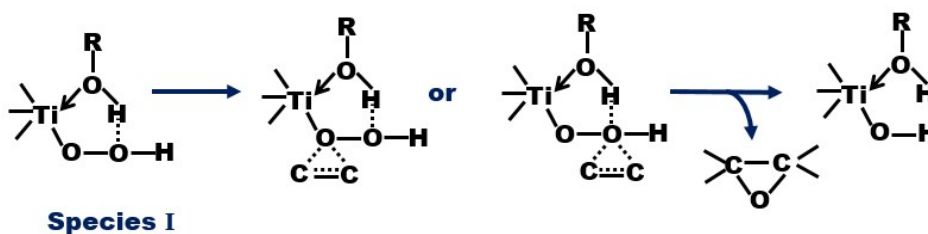

**Scheme S2.** Formation of cyclic species I and the coordination of cyclohexene to

the Ti-peroxo complex.

### **Tables related with catalytic performance**

**Table S1**

Influence of solvents on cyclohexene epoxidation on Ti-BEA samples by SAC method <sup>a</sup>

| Solvent          | Dielectric constants | Cyclohexene conversion (%) | Selectivity (%) |      |                     |
|------------------|----------------------|----------------------------|-----------------|------|---------------------|
|                  |                      |                            | Epoxide         | Diol | Others <sup>b</sup> |
| Acetonitrile     | 37.5                 | 59.5                       | 55.7            | 21.3 | 23.0                |
| Acetone          | 20.7                 | 62.5                       | 8.6             | 80.2 | 11.2                |
| Butanone         | 18.5                 | 71.6                       | 7.8             | 79.8 | 12.4                |
| Methanol         | 32.7                 | 92.0                       | 0.2             | 14.8 | 85.0                |
| Ethanol          | 24.5                 | 82.8                       | 0.4             | 28.0 | 71.6                |
| Tertiary Butanol | 10.9                 | 62.8                       | 1.6             | 70.4 | 28.0                |

<sup>a</sup> Reaction conditions: 30 mmol cyclohexene; 10 mmol H<sub>2</sub>O<sub>2</sub>; 50 mg catalysts with Si/Ti=36; reaction temperature, 323 K; duration, 2 h.

<sup>b</sup> Mainly allylic oxidized products: 2-Cyclohexene-1-ol and 2-Cyclohexene-1-one.

**Table S2**

Cyclohexene epoxidation over various titanasilicate zeolites <sup>a</sup>

| Different zeolites     | Si/Ti | Cyclohexene conversion (%) | Selectivity (%) |      |                     |
|------------------------|-------|----------------------------|-----------------|------|---------------------|
|                        |       |                            | Epoxide         | Diol | Others <sup>b</sup> |
| TS-1                   | 83    | 3.3                        | 17.9            | 75.7 | 6.4                 |
| Ti-MWW                 | 45    | 8.1                        | 35.0            | 58.8 | 6.2                 |
| Ti-MOR <sup>c</sup>    | 92    | 9.0                        | 55.0            | 39.1 | 5.9                 |
| Ti-BEA-HT <sup>d</sup> | 60    | 16.5                       | 78.4            | 18.6 | 3.0                 |
| Ti-BEA-SAC             | 36    | 44.8                       | 53.8            | 23.7 | 22.5                |

<sup>a</sup> Reaction conditions: 10 mmol cyclohexene; 10 mmol H<sub>2</sub>O<sub>2</sub>; 50 mg catalysts; Solvent, acetonitrile; reaction temperature, 323 K; duration, 2 h.

<sup>b</sup> Mainly allylic oxidized products: 2-Cyclohexene-1-ol and 2-Cyclohexene-1-one.

<sup>c</sup> It was post-synthesis by treating the dealuminated Al-BEA with TiCl<sub>4</sub> vapor. The reaction conditions are the same as others except for using 0.2 g catalyst.

<sup>d</sup> It was prepared by direct hydrothermal synthesis. The reaction conditions are the same as others except for using 0.28 g catalyst.

**Table S3**

Recyclability of Ti-BEA zeolites prepared by SAC method in cyclohexene epoxidation <sup>a</sup>

| Sample <sup>b</sup> | Si/Ti molar ratio (product) <sup>d</sup> | Cyclohexene conversion (%) | Selectivity (%) |                   |                     |
|---------------------|------------------------------------------|----------------------------|-----------------|-------------------|---------------------|
|                     |                                          |                            | Epoxide         | Diol <sup>c</sup> | Others <sup>c</sup> |
| 1 st                | 38                                       | 67.2                       | 50.6            | 22.7              | 26.7                |
| 2 nd                | 41                                       | 61.0                       | 46.8            | 25.0              | 28.2                |
| 3 rd                | 47                                       | 44.9                       | 42.8            | 25.4              | 31.8                |
| 4 th                | 50                                       | 30.6                       | 42.7            | 23.9              | 33.4                |

5 th                                      50                                      20.9                                      38.5                                      24.8                                      36.7

<sup>a</sup> Reaction conditions: 30 mmol cyclohexene; 10 mmol H<sub>2</sub>O<sub>2</sub>; 100 mg catalysts with Si/Ti=36; reaction temperature, 323 K; duration, 2 h.

<sup>b</sup> After each run, the catalyst was washed with acetonitrile and then distilled water four times. The solid material was dried at 110 °C and then calcined at 550 °C for 6 h before the next run.

<sup>c</sup> Mainly allylic oxidized products: 2-Cyclohexene-1-ol and 2-Cyclohexene-1-one.

<sup>d</sup> Given by ICP.

#### **Table S4**

Catalytic performance of Ti-BEA-SAC in different catalytic reactions.

| Reactions                               | Si/Ti <sup>d</sup> | Conversion (%) | Selectivity (%) |
|-----------------------------------------|--------------------|----------------|-----------------|
| 1-hexene epoxidation <sup>a</sup>       | 70                 | 10.1           | 98.0            |
| allyl chloride epoxidation <sup>b</sup> | 71                 | 20.7           | 98.3            |
| cyclohexanone ammoximation <sup>c</sup> | 73                 | 58.0           | 99.0            |

<sup>a</sup> Reaction conditions: catalyst, 50 mg; 1-hexene, 10 mmol; H<sub>2</sub>O<sub>2</sub> (30 wt.% aqueous solution), 10 mmol; solvent, 10 mL; temp., 333 K; time, 2 h

<sup>b</sup> Reaction conditions: catalyst, 50 mg; allyl chloride, 10 mmol; H<sub>2</sub>O<sub>2</sub> (30 wt.% aqueous solution), 10 mmol; solvent, 10 mL; temp., 333 K; time, 2 h

<sup>c</sup> Reaction conditions: catalyst, 50 mg; cyclohexanone, 10 mmol; NH<sub>3</sub> (25 wt.%), 12 mmol; H<sub>2</sub>O<sub>2</sub> (30 wt.% aqueous solution), 12 mmol; solvent, 10 mL; temp., 338 K; time, 2 h.

<sup>d</sup> Given by ICP.
